# **An agent-based model of adaptation of holobionts with different microbial symbiont transmission modes**

Running title: Simulation of holobiont adaptation to stress

**Siao Ye<sup>1#\*</sup>, Zhu Liu<sup>2\*</sup> and Evan Siemann<sup>1</sup>**

<sup>1</sup>Department of Biosciences, Rice University, Houston, Texas, 77005, USA

<sup>2</sup>Department of Preventive Medicine, Keck School of Medicine, University of Southern California, Los Angeles, 90007, USA

<sup>#</sup>Corresponding author: Department of Biosciences, Rice University, 6100 S. Main St., Houston, Texas, 77005, USA; E-mail: [thomasyesiao@gmail.com](mailto:thomasyesiao@gmail.com)

*\*Siao Ye and Zhu Liu contributed equally to this work. Author order was determined both alphabetically and in order of increasing seniority.*

## **KEYWORDS**

Endosymbiosis, holobiont, agent-based modeling, adaptation, stress

# **ABSTRACT**

The hologenome theory suggests that holobionts (host plus symbiont) with hosts that are only able to adapt slowly may be able to persist in deteriorating environmental conditions via rapid adaptation of their microbial symbionts. The effectiveness of such symbiont adaptation may vary depending on whether symbionts are passed directly to offspring (vertical transmission) or acquired from the environment (horizontal transmission). However, it has been suggested that holobionts with horizontal transmission cannot pass down their symbionts faithfully, preventing adaptation at the holobiont level because of host-symbiont disassociation between generations. Here we used an agent-based model to investigate whether holobionts with horizontal microbial symbiont transmission can adapt to increasing stress solely through symbiont adaptation and compared their adaptation to holobionts with vertical transmission. We found that holobionts with either transmission mode were able to adapt to increasing abiotic stress solely via symbiont adaptation. Moreover, those with horizontal transmission were more competitive than those with vertical transmission when hosts were able to selectively associate with the most suitable symbionts. However, those with horizontal transmission were less competitive than those with vertical transmission when symbiont establishment was random. Our results support the hologenome theory and demonstrate that holobionts with horizontal microbial symbiont transmission could adapt to increasing abiotic stress via their symbionts. We also showed that whether holobionts with horizontal or vertical symbiont transmission are favored in increasingly stressful conditions depends on the ability of hosts to recognize and foster microbial symbionts that confer stress tolerance.

## IMPORTANCE

Symbiotic organisms such as reef building corals are sensitive to environmental perturbations due to anthropogenic disturbances or climate change, and it is critical to understand whether they are able to adapt to previously unfavorable conditions. To date, studies have focused on the impacts of existing microbial symbiont variation on holobiont stress tolerance but here we use agent-based models to explore holobiont adaptation via symbiont adaptation. We studied both deterministic and stochastic processes in holobiont adaptation by investigating the following four factors: holobiont transmission modes, a host's ability to recognize tolerance-conferring symbionts, a symbiont's mutational variance, and rate of stress increase. Our simulation provides a comprehensive understanding of holobiont adaptation under stress, which not only has implications for future endangered symbiotic species management, but also provides fresh insight into species evolution as proposed by the hologenome theory.

## INTRODUCTION

Research on symbiotic organisms has suggested that symbiont variation can drive holobiont (host plus symbiont) phenotypic diversification, and influence holobiont fitness (1). In addition to host genetic changes, symbiont genetic changes can alter the holobiont phenotype and therefore impact holobiont adaptation (2). Zilber-Rosenberg and Rosenberg proposed that rapid holobiont adaptation could take place even when host adaptation is slow, because symbiont adaptation and composition shifts could be rapid (3). A diversity of potential symbiont partners are rich resources for holobionts, which might be critical for holobionts to adapt to increasing environmental stress such as global warming (4, 5).

Compared to hosts, symbionts have large population sizes and short generation times, and may adapt to ambient changes (6), yet it is unclear whether symbiont adaptation alone could drive holobiont adaptation. Most studies on holobionts focused on variation in symbiont composition rather than symbiont adaptation. For example, researchers found cnidarians associating with different symbiont strains differ in their thermal tolerances (5, 7), and thermal tolerance of aphids can be controlled by their symbiotic bacteria (8, 9). Such changes in holobiont phenotype are mainly based on existing symbiont diversity and can be observed within one generation. However, experiments testing holobiont adaptation via symbiont adaptation and composition shifts would be difficult because they require tracking of symbiont composition as well as holobiont phenotypes over a long time and so is less explored. Chakravarti et al. (10) pointed out that assisted evolution in symbionts can be applied to improve holobiont stress tolerance, and they were able to detect its impact on symbionts stress tolerance, but not on the holobiont stress tolerance. Some field observations also suggest holobiont adaptation can be achieved through symbiont adaptation. Rodriguez et al. (11) discovered the stress tolerance

conferred by a symbiotic fungi to host plants is habitat dependent. Another study on corals also revealed local adaptation existed in symbionts and leads to holobiont divergence in their thermal tolerance, in which the symbiotic algae collected from warmer reefs maintained higher resistance to heat compared to those from cooler habitats even after multiple asexual generations (12). Nevertheless, it is hard to monitor symbiont adaptation in the field over evolutionary time scales and track its impact on holobiont fitness. A simulation model would be appropriate to study holobiont adaptation via symbiont adaptation (13, 14), which is lacking in holobiont research.

To investigate whether holobionts can adapt to stressful environments via symbiont adaptation, it is critical to understand whether holobionts with either horizontal symbiont transmission (“H” hereafter) or vertical symbiont transmission (“V” hereafter) are both able to pass their adaptive symbionts to offspring, and which type is better at coping with stress. Some researchers argue that passing down adaptive symbionts to offspring is unstable for holobionts conducting horizontal transmission, which makes the hologenome theory less plausible (15, 16). They suggest the symbiont community could be shaped simply by opportunity and environmental filters, and the transmission fidelity is low (15, 16). In addition, opposite opinions are given when discussing H’s and V’s adaptability. In vertical transmission, individuals inherit symbionts directly from parents, which is similar to classical gene inheritance, so adaptive symbionts from parents can be passed to offspring (17). But there are drawbacks associated with this transmission mode; symbionts picked up by offspring might only be a subset of their parents’, so symbiont diversity could decrease dramatically through evolutionary time, and become maladaptive once the ambient conditions change (18, 19). On the other hand, individuals conducting horizontal transmission pick up a variety of symbionts in the neighborhood, so they might respond to environmental changes faster by associating with stress tolerant symbionts (4,

20). However, the disassociation of symbionts and hosts between generations could lead to loss of adaptive symbionts and colonization of virulent symbionts (21, 22). Most studies on microbe transmission and adaptation in the past investigated how different transmission modes affect virulence (17, 22–24), and explored the dynamics of virulence-transmission trade off instead of considering them as a selection unit (25–27), because their systems emphasize antagonistic rather than mutualistic relations between the host and the symbiont. Roughgarden (28) conducted a pioneering simulation of holobiont evolution and found both vertically transmitted and horizontally transmitted agents were able to evolve as a holobiont unit. But she used the number of microbes to determine holobiont fitness in her model, and did not study the interactions between the environment and holobionts. Because of the complex interactions among the host, the symbiont, and the environment, combined with the different symbiont acquisition and retention mechanisms in Hs and Vs, it is hard to predict whether Hs and Vs are able to adapt to climate change, and which mode is more adaptive with increasing environmental stress. Holobionts with different transmission modes could differ in their novel symbiont acquisition and retention, which makes it hard to predict whether they are able to adapt to climate change, and which modes is more adaptive.

Here we use agent-based modeling to explore how holobionts with different transmission modes respond to increasing stress because such models are flexible and able to handle complex problems (29, 30). Interestingly, such topics are better explored in cultural transmission, where researchers explore how knowledge information (*e.g.*, language, knowledge, etc.) is transmitted between generations under different environment regimes (31). In cultural transmission, vertically inherited information (from parents) is more conservative than obliquely acquired (from elder people excluding parents or ancestors) (32), which resembles vertically transmitted

symbionts and horizontally transmitted symbionts. Some studies reveal oblique transmission is favored when the environment fluctuates, and is necessary in driving language evolution, while vertical transmission is preferred when the environment is stable (33, 34). However, there could be fundamental differences between cultural transmission and symbiont transmission. For example, there is no increasing stress such as global warming in cultural transmission, so these studies do not provide insights into whether both transmission modes allow holobiont adaption to directional selection. In addition to transmission modes, we considered three other important factors that might impact holobiont persistence in changing climate: 1) the host's ability to select adaptive symbionts, 2) the rate at which stress increases, and 3) symbiont mutational variance.

We propose that the ability to select adaptive symbionts is a key factor when studying holobiont adaptation, even though it is barely discussed, if at all, in previous research. Because the amount of resources and space an organism can provide to symbionts is limited, holobiont fitness is largely determined by the relative amount of adaptive symbionts within it (3, 35). So if symbiont acquisition is completely random, then Hs will have no advantages over Vs even if Hs have access to a larger symbiont pool from which they can choose partners, because the chances of getting adaptive and maladaptive symbionts are the same. In addition, drift might have larger impacts on Vs because the bottleneck effect is stronger in them due to the smaller effective symbiont population size (18). On the contrary, if symbiont acquisition is not random but can be determined by the host, then Hs might be more likely to associate with adaptive symbionts than Vs, and drift impacts would be limited. Such symbiont selection by hosts is not uncommon and has been found in both Hs and Vs, for example, solitary wasps block transmission of nonnative symbionts to offspring, and sorghum selectively increases monoderm bacteria during drought to

improve plant growth (36–38). Thus we tested the impacts of drift on Hs and Vs adaptation by switching on and off the ability of holobionts to select for adaptive symbionts in our model.

Whether holobionts are able to adapt to the changing environment via symbiont adaptation also depends on how fast stress increases and how fast symbionts adapt. Holobionts such as corals are assumed to rely on the symbiont rather than the host to adapt to rising sea temperature, because corals are living close to their thermal limits and the temperature is increasing quickly (39, 40). Compared to the host, the symbionts are abundant with short generations, so they are more likely the key to holobiont adaptation (3, 41). Because most symbionts (*e.g.*, bacteria, algae, fungi) reproduce asexually (10, 42), we consider mutation the major source of generating novel traits. Incorporation of mutation in our model makes the traits continuous and dynamic instead of static and discrete, and generates intra-individual as well as inter-individual symbiont variation. Such variation is necessary in understanding the complex interactions between holobionts and the environment, and interactions among holobionts (43, 44). Because population trait variance is sensitive to the magnitude of mutation (*i.e.*, mutational variance) rather than mutation rate, it is important to know how mutational variance might affect distribution of symbiont traits and thus holobiont adaptation (45, 46). Large mutational variance may have greater impacts on horizontally transmitted holobionts, because once an extreme symbiont strain arises, it can be transmitted throughout the population and may be hard to lose, while it will be constrained in certain lineages in vertically transmitted holobionts. But large mutational variance could also produce lineages that have accumulated extreme symbionts in Vs when drift is strong. By varying the speed at which stress increases and mutational variance, combined with controlling drift, we explored how the selection-mutation-drift balance interacted with transmission modes.



Our goal was to present a model to test whether holobiont adaptation can be driven by associated symbiont changes, which involves symbiont mutation, acquisition, amplification and transmission. The agent-based model we used simulated changes at the environment level, the holobiont level, and the symbiont level, by varying four main parameters: transmission mode, the ability to select adaptive symbionts, the rate of environmental change and the magnitude of symbiont mutation. It involves interactions between the environment and the holobionts, among the holobionts, and between the holobionts and the symbionts. We believe our model could produce novel insights into holobiont adaptation.

## RESULTS

### Test case

We verified that when agents were selectively neutral in our basic model, the fixation was random at a 1:1 V to H initial ratio (Fig. 1).

### Increasing temperature

Regardless of whether transmission is random or optimal, both Vs and Hs were able to adapt to increasing temperature when the rate of temperature increase was low and mutation variance was high (Fig. 2).

Generally, holobionts persisted in high mutation variance and low temperature rate of change conditions, but went extinct in low mutation variance and high temperature rate of change conditions.

However, the transmission mode did affect the relative fitness of Hs and Vs (Fig. 3). When transmission was completely random, Vs had higher fitness (Wilcoxon test,  $p=0.0002$ ) and longer time to extinction (Wilcoxon test,  $p=0.03$ ) compared to Hs for the same parameter

combination, and their gene values also had higher correlation with the temperature (Wilcoxon test,  $p=0.0017$ ). When transmission was optimal, Hs had higher fitness and longer time to extinction, as well as higher correlation between gene values and temperature.

When both agent types were present at the same time, we were able to compare the ratio of Hs and Vs (Fig. 4), which tells their relative competitiveness. In both random transmission and optimal transmission models, Hs and Vs became extinct in large step/small mutation\_sd regions, and coexisted in small step/small mutation\_sd regions. In the rest of regions, Vs persisted in the random transmission model (Fig. 4a), and Hs persisted in the optimal transmission model (Fig. 4b).

We also checked how virulence would affect the relative competitiveness of Hs and Vs by reducing birthrate of Hs by 5% at mutation\_sd=0.001 and step=0 in both models. This resulted in Vs fixation in both models.

To explore how drift shapes symbiont distribution in the random transmission model, we compared fitness variance between individuals and within individuals (Fig. 5). We found Vs had larger variance among individuals (Wilcoxon test,  $p<0.001$ ), but less variance within individuals (Wilcoxon test,  $p<0.001$ ). This means symbiont distributions in each vertical holobiont were more homogenous than in each horizontal holobiont, but vertical holobionts were more heterogeneous than horizontal holobionts across the holobiont fitness landscape.

## DISCUSSION

We present here an agent-based model that investigates the adaptation ability of vertically transmitted holobionts and horizontally transmitted holobionts to increasing stress through symbiont adaptation. By introducing intraspecific trait variation and enabling evolution, we were

able to study how selection-mutation-drift affected the population dynamics of holobionts with different transmission modes. Our model clearly demonstrates that both Vs and Hs are able to adapt to increasing environmental stress via symbiont adaptation, and their relative competitiveness depends on whether symbiont transmission is random or not. As long as the stress does not increase at a speed that will drive the holobionts to extinction rapidly, symbiont adaptation alone could increase holobiont stress tolerance.

Our model suggests the answer to a long debated question: can horizontally transmitted species be considered as a selection unit even though the symbiont disassociates from the host during holobiont life history (16, 47)? We showed that although offspring do not necessarily inherit symbionts from their parents directly, they could still acquire adapted symbionts. We found stress tolerance conferred by symbionts improved over time as the mean symbiont gene value increased along with increasing temperature. This was because holobionts whose symbiont values better matched the temperature were more likely to survive, and they passed their adapted symbionts to individuals in the next generation. In other words, because selection acts on the population level and drives the symbiont to confer higher stress tolerance, individual holobionts sampled from a symbiont pool that was adapting, and thus became adapted. This process looks like a Lamarckian evolution because agents acquire stress tolerance by associating with stress-resistant symbionts horizontally (48), but it is actually Darwinian evolution on the whole symbiont population level since the symbiont gene frequency changes due to selection against maladapted holobionts. Osmanovic *et al.* (49) found that selection on toxin tolerance of vertically transmitted bacteria alleviated holobiont stress in a long-lasting toxic environment. They suggested that horizontally transmitted symbionts can also be selected for and will confer higher stress tolerance to hosts over time which is similar to our results here. Acquiring adaptive

traits via associating with horizontally transmitted symbionts is commonly observed in nature. In aphids, the secondary symbionts are considered to form a horizontal gene pool which facilitate aphid adaptation (50). Redman *et al.* discovered fungal-free plants that received *Curvularia* isolates (a type of fungal endophyte) from geothermal regions exhibited improved thermal tolerance, which also suggests stress tolerance could be acquired horizontally (51). In addition, research on corals with horizontally transmitted symbionts revealed surprisingly high fidelity in symbionts across generations, indicating unknown mechanisms that maintain symbiont stability in Hs (52). Thus we propose that symbiont-mediated holobiont adaptation is plausible in both Hs and Vs.

Further comparison of Vs' and Hs' adaptation ability shows that whether holobionts are able to identify and partner with suitable symbionts or not is critical in determining their relative competitiveness. Researchers have opposite opinions regarding which transmission mode is more advantageous because of following reasons: on one hand, Hs could exploit a broader range of symbionts, and are likely to take up adaptive symbionts from the environment (21, 53), while Vs can only inherit parents' symbionts, which may be maladaptive once the environment changes (54, 55). On the other hand, adaptive symbionts could be passed down faithfully in vertical transmission, but get lost during horizontal transmission (4, 15). Our results suggest both arguments are partially correct, but are case dependent because symbiont acquisition could be random or non-random, which has significant impacts on the outcome (56). When transmission is random, Hs have no advantage even though the holobionts have access to a wider range of symbionts, because the chances of taking up adaptive and maladaptive symbionts are equal; but when they are able to recognize adaptive symbionts, they can pick up the fittest symbionts from a larger pool compared to the limited choices Vs have, which greatly improves their performance.

In random transmission scenarios, drift is stronger in Vs and can drive symbiont fixation in offspring lineages rapidly because they experience strong bottleneck effects given limited symbiont options in parents (18, 57); in contrast, Hs offspring tend to maintain their parents' optimum according to the law of large numbers, because they sample from a larger symbiont pool (58). Our simulation of Hs and Vs without selection has shown that symbiont similarity is higher within each V than within each H (*i.e.*, within host symbiont variation is larger in H individuals than in V individuals), but lower among Vs than among Hs (*i.e.*, between-host symbiont variation is lower among Hs than among Vs). This is consistent with studies on corals, that found symbionts among vertically transmitted corals are more differentiated, and symbionts among horizontally transmitted corals are less differentiated (52, 59). In psyllids, some hosts are found to harbor only clonal symbiont lineages due to their vertical transmission mode, and the low diversity within the holobiont suggests a strong bottleneck effect (60). Given enough time, vertically transmitted symbionts could become so specific in host lineages that they will have reduced genome sizes and cannot escape from hosts (61). The strategies of Vs and Hs are thus different when facing environmental changes. Vs produce lineages that are distinctive in their stress tolerance, while Hs produce individuals more likely to persist in all conditions. Because maladaptive lineages that are dominated by maladaptive symbionts can be removed quickly from V populations, while maladaptive symbionts can persist in H populations through coexisting with adaptive symbionts, Vs are able to respond to environmental changes faster than Hs, and thus adapt faster when symbiont transmission is random.

Moreover, extremely maladaptive symbionts could be transmitted across the whole H population, while they are constrained in certain lineages in the V population, because of the larger potential host population available for each symbiont in Hs (21). From this perspective,

having maladaptive symbionts is similar to having parasites, which may provide additional explanation for why higher virulence is often associated with horizontal transmission (24, 27). Because maladaptive symbionts can be acquired by holobionts other than direct descendants, they could persist in Hs just like infectious diseases, and decrease Hs' overall fitness. In contrast, V individuals have a smaller sampling pool, which is determined by their parent, and offspring that are quickly dominated by maladaptive strains due to drift can be selected against (57), so overall fitness improves faster under selection. In short, once maladaptive symbionts arise in Hs, they can be taken up and spread through the population and are unlikely to be eliminated, but in Vs they can be trapped within lineages and be selected against, causing lower overall fitness in Hs than Vs. In an extreme scenario when the stress increasing speed is zero (*i.e.*, under a constant environment), although both populations could persist for the whole simulation, Vs had slightly higher fitness especially when the mutational variance is large, where maladaptive symbionts are likely to arise and spread in Hs. Given enough time, Vs should be able to outcompete Hs (Fig. 5a). This resembles results of a study on virulence in pathogens, where vertical transmitted pathogens were selected for to prevent host from acquiring more virulent pathogens horizontally (27), and is consistent with study results of cultural transmission that suggest Vs are favored under stable conditions (33, 62). Our simulation also support the hypothesis that vertically transmitted holobionts such as corals may be more robust to climate change (63), but conditional on them conducting random transmission.

When we incorporated optimal symbiont uptake into the model, surprisingly we had the opposite result that Hs were better at tracking a changing environment. Such "recognition" of suitable symbionts is not well explored in previous studies (28, 34), yet their impacts on the outcome was very important in our simulation. We think such optimal transmission is equivalent

to the positive transgenerational feedback proposed by Xue and Leibler (64). They suggested phenotypes of parents are reinforced in offspring, so organisms could adapt to varying environments. The positive transgenerational effect has been observed in some empirical studies, which is probably caused by epigenetic processes (65, 66). Our previous experiment on green hydra also showed that positive transgenerational effects could occur in holobionts simply via transmission of acclimated symbionts. The model presented here is slightly different from that described in Xue and Leibler's and examples mentioned above, because here we are focusing on symbiont evolution rather than host evolution, and the phenotypes are distributed continuously rather than discretely. Nevertheless, the acquired symbionts were derived from those hosted by holobionts in the previous generations, which were more likely to be decedents of adaptive symbionts than maladaptive symbionts in their ancestors. Because the temperature in our model changes in one direction, the fittest new mutants are more likely to arise from the dominant, fittest strain in parent, instead of from a less fit strain. Such horizontal transmission of stress-tolerant symbionts has been observed in corals, which suggests holobiont adaptation can be achieved through transmission of adaptive symbionts (67, 68). By having access to symbionts released by holobionts other than their direct ancestors, Hs were able to selectively associate with the fittest strain that arose in the population which is in contrast to Vs. The ability to pick up the fittest symbionts, which is similar to copying from the most successful individuals in social learning, increases Hs fitness and allows them to adapt faster than Vs (69).

There are two potential mechanisms that hosts are able employ to take in the fittest symbionts: the first is via partner choice; the second is via passive up take. Mounting evidence of partner choice is being shown for holobionts (70), for example, plants allocate more resources to more beneficial partners and punish more parasitic partners (38, 71), so they could avoid

cheaters and maximize their fitness during symbiosis. Bobtail squid are able to prevent colonization of deficient luminescent bacteria *Vibrio fischeri* in their light organ, which could be another case of partner choice (72). Massive coral bleaching could also be a case of hosts ejecting maladaptive symbionts and establishing symbiosis with adaptive ones (40). Corals are able to shift their symbiotic algae from sensitive strains to stress tolerant strains, so they can become more robust to stress such as high temperature and UV (53, 73–75). Thus even coral hosts that have long generation times and may not be able to adapt to warming temperatures quickly enough still have a chance to withstand climate change (3). An interesting example of wasps also shows that parents rather than the offspring may be able to choose symbionts to be transmitted (37), as such transmission could be controlled on a cellular level (76). In addition, even if the host is not able to identify the appropriate partner, they could form symbiosis with symbionts that pass an environment filter. Because symbionts vary in their stress tolerance, a strain that exhibits the highest fitness under certain conditions could outcompete other strains, and then form symbiosis with hosts (77). Hosts taking up these adaptive symbionts would acquire appropriate stress tolerance towards their environment (12). In insects, thermal stress could easily wipe out their thermal sensitive symbiotic bacteria, which could reduce their fecundity (8, 78). However, there are strains that could withstand such stress, and introducing these strains into hosts can restore hosts' reproduction and enhance their thermal tolerance (8, 79). Symbionts that diverge in their niches are able to confer different traits and form association with hosts in distinctive conditions, which facilitates holobiont diversification (9, 50, 80). These examples provide solid evidence of optimal transmission of symbionts and suggest we should take optimal symbiont transmission into consideration when studying holobiont persistence in stressful environments.



Regardless of transmission mode and the ability to associate with optimal symbionts or not, holobionts were more likely to persist under stress when their mutational variance was large and stress increasing speed was low. It is not surprising that holobionts were able to persist longer at low rates of increasing temperature, because other studies also suggest rapid increase in stress could quickly wipe out the organisms (45, 81). However, Ayllón *et al.* (46) did not detect significant impacts of mutational variance on adaptation, and they suggested it was because their simulation ran for a limited number of generations (barely over 100 generations). In contrast, our simulations lasted for 4000 generations. Moreover, whether holobionts went extinct or not seemed to be confined by non-linear combinations of the mutational variance and temperature increasing speed, which requires larger increase in mutational variance at high rates of temperature increase than that at low rates of increase (Fig. 4).

Our models are the first exploring holobiont adaptation to stress, and demonstrate that both Hs and Vs are able to adapt, even when symbionts and hosts are disassociated between generations in Hs. Yet the model could be further expanded by incorporating more factors that might affect the dynamics between Hs and Vs in different scenarios. For instance, conducting horizontal transmission could be virulent, which might reduce Hs' overall fitness and their competitiveness (27). In jellyfish, horizontal transmission favored symbionts shift to being parasitic, which reduced the growth rate of jellyfish up to 50% (22). We have applied this only to scenarios when there is no change in temperature, and found a 5% decrease in Hs' growth rate could greatly reduce their relative frequency in both random transmission and optimal transmission. This implies that under constant environments, vertical transmission with less virulent symbionts would be favored (17, 33, 62, 82). But if we adjust the virulence parameter in temperature increasing scenarios, we will be able to explore how virulence could alter holobiont

population dynamics. Another factor worth exploring could be the tradeoff between thermal tolerance and fitness cost. Studies on corals reveal that symbionts that confer higher thermal tolerance may slow down the growth of corals (83, 84). Imposing such constraints may enhance the authenticity of the model because holobionts will not be able to increase their thermal tolerance infinitely. We can also investigate into how Hs and Vs react in other scenarios such as random environments or fluctuating environments. We hope our models could provide a basic framework for holobiont evolution and shed light on symbionts' roles from both ecological and evolutionary perspectives.

## **MATERIALS AND METHODS**

Our model was coded in python 3.0 with the agent-based modeling package “Mesa”. Here we present a model description following the ODD (Overview, Design Concepts, Details) protocol by giving a summary of the overall model structure and processes (29). Detailed variables and functions definitions can be found in Appendix A.

### **Purpose**

The purpose of the model is to understand whether holobionts with vertical transmission or horizontal transmission could adapt to changing environments solely depending on their symbionts, and how drift and mutation would affect this process. The stress in this model is called “temperature”, which is a hypothetical stress without a real world metric because it could also be called “salinity” or “UV intensity”. Similarly, each timestep represents one generation time, and has no corresponding real-world time length, because symbiotic species vary in their generation time. To minimize the model complexity, holobionts (the agents) in our model are autotrophic or heterotrophic with unlimited food and so do not need to compete for food, but

they have to compete for space, which is common in ecosystems such as coral reefs or for plants (41, 85). Once a grid cell is occupied, it cannot be taken over by another agent unless the previous occupier is dead.

## **Scales and variables**

The model simulates adaptation of Vs and Hs under different temperature regimes, which contains three hierarchical levels: 1) environment, 2) holobiont, 3) symbiont. The object of the environment level is temperature. The temperature is a standardized hypothetical parameter without units because we are not studying a specific species and a specific stress tolerance, but rather to verify if holobionts can evolve as a unit. Each time step represents one generation, and agents could die or give birth to one offspring. The objects of the second level are the two types of holobionts, Vs and Hs, which only differ in their transmission modes. To track the adaptability of Vs and Hs, agents reproduce asexually and do not switch their transmission modes across generations. This allowed us to better track symbiont compositions of the two agent types over time, and compare fitness of Vs and Hs. The object of the third level, symbiont, is the only factor that determines holobionts' fitness. Because our goal is to test whether both Vs and Hs can adapt via symbiont adaptation, and many holobionts' stress tolerance is largely determined by symbiont stress tolerance (40, 86–88), we assume no host impacts on holobiont's stress tolerance in this model. Each agent contains a fixed number of symbionts, and each symbiont is assigned a randomly generated gene value from which the host fitness will be calculated.

## **Scheduling**

The model is executed in following steps:

(1). Model Initialization

Initially 2000 agents are generated and randomly distributed on a 50\*50 size grid. In cases where both Hs and Vs are presented, each agent has 50% chance to be H and 50% chance to be V. Each agent contains 50 symbionts, whose value is drawn from a normal distribution with mean equal to 0.5 and variance equal to mutational variance, truncated at two standard deviations (46, 89). Initial temperature is set at 0.5 as well.

## (2). Holobiont reproduction

At every time step, each agent has a chance to reproduce based on its fitness, which is the mean of the fitness score calculated for its symbionts, assuming all the symbionts within the host will affect the holobiont's fitness. We used a symmetric beta distribution to calculate the fitness score (90), which reaches the maximum when the symbiont's gene value matches current temperature (Fig.6), and reaches a minimum when the mismatch is equal or greater than one, in other words, the current temperature could be either too hot or too cold for the symbiont. A random number is generated and compared to the holobiont's fitness value to decide whether it will reproduce or not. Because conducting horizontal transmission might suppress holobiont reproduction, we introduce a cost parameter "I" that could reduce H's reproduction probability (82).

## (3). Symbiont transmission

In the default model, drift is introduced by enabling random symbiont transmission in Hs and Vs. V offspring sample symbionts from their parents randomly with replacement, so their symbionts could be a subset of those in their parents. H offspring sample symbionts from other agents around them once they are produced and dispersed (17). This transmission process is

equivalent to picking up symbionts from a common pool constitute of symbionts released from agents (28).

In the optimal transmission model, drift is suppressed by enabling agents to pick the fittest symbionts from parents. As in cases where certain symbiont strains is dominant while the rest strains are marginal, here offspring choose the fittest strain from the parent (in V) or from neighboring agents (in H) to make up the symbiont population, and then randomly sample with replacement as in the default model to fill the rest of its symbiont population.

#### (4). Symbiont mutation

During holobiont reproduction, the symbiont may mutate by chance once it is acquired by the offspring. The mutation probability of each symbiont strain within the holobiont is set at 0.01 (91), given that symbiont generation time is shorter than holobiont generation time while the abundance is large (92, 93). The mutated symbiont gene value is drawn from a normal distribution with mean centered on the original symbiont gene value, variance controlled by the mutational variance, truncated at two standard deviation from the mean (46). Since we are interested in whether symbiont gene changes could drive holobiont adaptation, we assume heritability equals one and there is no environmental variance in our model.

#### (5). Holobiont dispersal

We use a stepwise function to control the position of a newborn holobiont. Because the further away from the parent the less likely the offspring would occur (94), we set equally high probability within certain distance for the new holobiont to occupy the gird, and equally low probability beyond certain distance for the holobiont to occur.

## (6). Selection

Agent fitness is calculated as described above, except for the decision whether the agent will die or not.

Detailed parameters are documented in appendix A, and each parameter combination was run for 4000 time steps and at least 20 iterations.

## Design Concepts

**Emergence:** Population dynamics emerge from the reproduction, selection and competition of the two types of agents, embedded with symbiont drift and mutation. Adaptation is driven by interactions between each agent and the environment.

**Sensing:** Agents can perceive the temperature and know their transmission modes. In the optimal transmission model, agents are able to pick the fittest symbionts from their ancestors.

**Interaction:** Competition for space (empty cells) is modeled explicitly, based on a first come first serve rule. Reproduction and selection is simulated based on the beta functions (90) which depict the relation between fitness and temperature stress.

**Stochasticity:** At each process, the order of agents to execute the code is random. All behavioral parameters are generated based on empirical probability distributions. That means the reproduction, dispersal, and selection of agents are not deterministic, and symbiont values after mutation and inheritance in each agent are random. This introduces stochasticity on both symbiont and holobiont levels, and the final results are emergent from interactions between individuals and the environment.

Observation: For model analysis, population-level data were recorded, i.e., population size over time, relative ratio of the two agent types, mean holobiont optimal temperature, and time to extinction, etc. (95).

## **Simulation scenarios**

### **(1) Test case**

To test and validate the model, we constructed a basic model that both agent types have equal fixed reproduction and survival probability, so they are selectively neutral and their fitness does not depend on the environment. This could be viewed as two genotypes in a finite population, whose fixation should be random. According to Kimura & Ohta (57), when the initial relative ratio is 0.5, either H or V will fix at 50% chance, and if the initial relative ratio moves away from 0.5, one or the other will be more likely to fix within dramatically less time.

### **(2) Increasing temperature**

The temperature was projected to increase at different speed infinitely, which means holobionts would only be able to persist by having novel mutations conferring thermal tolerance higher than that of existing symbionts. This model tested whether both Vs and Hs could keep up with increasing stress, and explored how symbiont mutational variance might affect this process given different increasing speed. For both random transmission model and optimal transmission model, Hs and Vs were simulated in coexistence and in separation.

## **Statistical analysis**

We used paired Wilcoxon rank tests to compare the fitness between Hs and Vs across all the parameter combinations. We summed up the mean holobiont fitness at each time step of

494 every iteration for a given parameter combination and performed a log transformation. This  
 495 provides us information that includes both the fitness at each time step as well as the extinction  
 496 time. We used the same test for Hs and Vs extinction time, correlation between holobiont gene  
 497 values and the temperature, fitness score variance within holobionts, and fitness score variance  
 498 between holobionts.

499



# REFERENCES

1. Hurst GDD. 2017. Extended genomes: Symbiosis and evolution. *Interface Focus* 7: 20170001.
2. Haag KL. 2018. Holobionts and their hologenomes: Evolution with mixed modes of inheritance. *Genet Mol Biol* 41:189–197.
3. Zilber-Rosenberg I, Rosenberg E. 2008. Role of microorganisms in the evolution of animals and plants: the hologenome theory of evolution. *FEMS Microbiol Rev* 32:723–735.
4. Byler KA, Carmi-Veal M, Fine M, Goulet TL. 2013. Multiple symbiont acquisition strategies as an adaptive mechanism in the coral *Stylophora pistillata*. *PLoS One* 8:e59596.
5. Berkelmans R, van Oppen MJ. 2006. The role of zooxanthellae in the thermal tolerance of corals: a ‘nugget of hope’ for coral reefs in an era of climate change. *Proc R Soc B Biol Sci* 273:2305–2312.
6. Lynch M, Gabriel W, Wood AM. 1991. Adaptive and demographic responses of plankton populations to environmental change. *Limnol Oceanogr* 36:1301–1312.
7. Ye S, Bhattacharjee M, Siemann E. 2019. Thermal tolerance in green hydra: Identifying the roles of algal endosymbionts and hosts in a freshwater holobiont under stress. *Microb Ecol* 77:537–545.
8. Dunbar HE, Wilson ACC, Ferguson NR, Moran NA. 2007. Aphid thermal tolerance is governed by a point mutation in bacterial symbionts. *PLoS Biol* 5:e96.

9. Heyworth ER, Ferrari J. 2015. A facultative endosymbiont in aphids can provide diverse ecological benefits. *J Evol Biol* 28:1753–1760.
10. Chakravarti LJ, Beltran VH, van Oppen MJH. 2017. Rapid thermal adaptation in photosymbionts of reef-building corals. *Glob Chang Biol* 23:4675–4688.
11. Rodriguez RJ, Henson J, Van Volkenburgh E, Hoy M, Wright L, Beckwith F, Kim Y-O, Redman RS. 2008. Stress tolerance in plants via habitat-adapted symbiosis. *ISME J* 2:404–416.
12. Howells EJ, Beltran VH, Larsen NW, Bay LK, Willis BL, van Oppen MJH. 2012. Coral thermal tolerance shaped by local adaptation of photosymbionts. *Nat Clim Chang* 2:116–120.
13. Evans MR, Grimm V, Johst K, Knuuttila T, de Langhe R, Lessells CM, Merz M, O'Malley MA, Orzack SH, Weisberg M, Wilkinson DJ, Wolkenhauer O, Benton TG. 2013. Do simple models lead to generality in ecology? *Trends Ecol Evol* 28:578–583.
14. Peck SL. 2004. Simulation as experiment: a philosophical reassessment for biological modeling. *Trends Ecol Evol* 19:530–534.
15. Moran NA, Sloan DB. 2015. The hologenome concept: Helpful or hollow? *PLOS Biol* 13:e1002311.
16. Douglas AE, Werren JH. 2016. Holes in the hologenome: Why host-microbe symbioses are not holobionts. *MBio* 7:e02099.
17. Drown DM, Zee PC, Brandvain Y, Wade MJ. 2013. Evolution of transmission mode in obligate symbionts. *Evol Ecol Res* 15:43–59.

- 541 18. Mira A, Moran NA. 2002. Estimating population size and transmission bottlenecks in  
542 maternally transmitted endosymbiotic bacteria. *Microb Ecol* 44:137–143.
- 543 19. Dusi E, Krensek S, Schrollhammer M, Sachse R, Rauch G, Kaltz O, Berendonk TU. 2014.  
544 Vertically transmitted symbiont reduces host fitness along temperature gradient. *J Evol*  
545 *Biol* 27:796–800.
- 546 20. Bright M, Bulgheresi S. 2010. A complex journey: transmission of microbial symbionts.  
547 *Nat Rev Microbiol* 8:218–230.
- 548 21. Douglas AE. 1998. Host benefit and the evolution of specialization in symbiosis. *Heredity*  
549 81: 599-603.
- 550 22. Sachs JL, Wilcox TP. 2006. A shift to parasitism in the jellyfish symbiont *Symbiodinium*  
551 *microadriaticum*. *Proceedings Biol Sci* 273:425–9.
- 552 23. de Roode JC, Yates AJ, Altizer S. 2008. Virulence-transmission trade-offs and population  
553 divergence in virulence in a naturally occurring butterfly parasite. *Proc Natl Acad Sci U S*  
554 *A* 105:7489–94.
- 555 24. Stewart AD, Logsdon JM, Kelley SE. 2005. An empirical study of the evolution of  
556 virulence under both horizontal and vertical transmission. *Evolution* 59:730–9.
- 557 25. Ferdy J-B, Godelle B. 2005. Diversification of transmission modes and the evolution of  
558 mutualism. *Am Nat* 166:613–627.
- 559 26. Blanquart F, Grabowski MK, Herbeck J, Nalugoda F, Serwadda D, Eller MA, Robb ML,  
560 Gray R, Kigozi G, Laeyendecker O, Lythgoe KA, Nakigozi G, Quinn TC, Reynolds SJ,  
561 Wawer MJ, Fraser C. 2016. A transmission-virulence evolutionary trade-off explains

attenuation of HIV-1 in uganda. *Elife* 5:e20492.

27. Lipsitch M, Siller S, Nowak MA. 1996. The evolution of virulence in pathogens with vertical and horizontal transmission. *Evolution* 50:1729.

28. Roughgarden J. 2018. Holobiont evolution: Model with lineal vs. collective hologenome inheritance. *bioRxiv* 465310.

29. Grimm V, Berger U, Bastiansen F, Eliassen S, Ginot V, Giske J, Goss-Custard J, Grand T, Heinz SK, Huse G, Huth A, Jepsen JU, Jørgensen C, Mooij WM, Müller B, Pe'er G, Piou C, Railsback SF, Robbins AM, Robbins MM, Rossmanith E, Rüger N, Strand E, Souissi S, Stillman RA, Vabø R, Visser U, DeAngelis DL. 2006. A standard protocol for describing individual-based and agent-based models. *Ecol Modell* 198:115–126.

30. Patt A, Siebenhüner B. 2005. Agent based modeling and adaptation to climate change. *Vierteljahrshefte zur Wirtschaftsforsch* 74:310–320.

31. Fogarty L, Feldman MW. 2015. Cultural evolution: Theory and models, p. 401–408. *In* International Encyclopedia of the Social & Behavioral Sciences: Second Edition. Elsevier.

32. Gong T. 2010. Exploring the roles of horizontal, vertical, and oblique transmissions in language evolution. *Adapt Behav* 18:356–376.

33. McElreath R, Strimling P. 2008. When natural selection favors imitation of parents. *Curr Anthropol* 49:307–316.

34. Ram Y, Liberman U, Feldman MW. 2019. Vertical and oblique cultural transmission fluctuating in time and in space. *Theor Popul Biol* 125:11–19.

35. Itoh H, Jang S, Takeshita K, Ohbayashi T, Ohnishi N, Meng XY, Mitani Y, Kikuchi Y. 2019. Host–symbiont specificity determined by microbe–microbe competition in an insect gut. *Proc Natl Acad Sci U S A* 116:22673–22682.
36. Xu L, Naylor D, Dong Z, Simmons T, Pierroz G, Hixson KK, Kim YM, Zink EM, Engbrecht KM, Wang Y, Gao C, DeGraaf S, Madera MA, Sievert JA, Hollingsworth J, Birdseye D, Scheller H V., Hutmacher R, Dahlberg J, Jansson C, Taylor JW, Lemaux PG, Coleman-Derr D. 2018. Drought delays development of the sorghum root microbiome and enriches for monoderm bacteria. *Proc Natl Acad Sci U S A* 115:E4284–E4293.
37. Kaltenpoth M, Roeser-Mueller K, Koehler S, Peterson A, Nechitaylo TY, Stubblefield JW, Herzner G, Seger J, Strohm E. 2014. Partner choice and fidelity stabilize coevolution in a Cretaceous-age defensive symbiosis. *Proc Natl Acad Sci U S A* 111:6359–64.
38. Werner GDA, Kiers ET. 2015. Partner selection in the mycorrhizal mutualism. *New Phytol* 205: 1437-1442.
39. Lough JM, Anderson KD, Hughes TP. 2018. Increasing thermal stress for tropical coral reefs: 1871-2017. *Sci Rep. Nature Publishing Group* 8:1-8.
40. Berkelmans R, Van Oppen MJH. 2006. The role of zooxanthellae in the thermal tolerance of corals: A “nugget of hope” for coral reefs in an era of climate change. *Proc R Soc B Biol Sci* 273:2305–2312.
41. Allemand D, Furla P. 2018. How does an animal behave like a plant? Physiological and molecular adaptations of zooxanthellae and their hosts to symbiosis. *C R Biol* 341:276–280.

42. Faeth SH. 2009. Asexual fungal symbionts alter reproductive allocation and herbivory over time in their native perennial grass hosts. *Am Nat* 173:554–565.
43. Bolnick DI, Amarasekare P, Araújo MS, Bürger R, Levine JM, Novak M, Rudolf VHW, Schreiber SJ, Urban MC, Vasseur DA. 2011. Why intraspecific trait variation matters in community ecology. *Trends Ecol Evol* 26:183–92.
44. Courbaud B, Vieilledent G, Kunstler G. 2012. Intra-specific variability and the competition-colonisation trade-off: Coexistence, abundance and stability patterns. *Theor Ecol* 5:61–71.
45. Burger R, Lynch M. 1995. Evolution and extinction in a changing environment: A quantitative-genetic analysis. *Evolution* 49:151.
46. Ayllón D, Railsback SF, Vincenzi S, Groeneveld J, Almodóvar A. 2016. InSTREAM-Gen: Modelling eco-evolutionary dynamics of trout populations under anthropogenic environmental change. *Ecol Modell* 326:36–53.
47. Theis KR, Dheilly NM, Klassen JL, Brucker RM, Baines JF, Bosch TCG, Cryan JF, Gilbert SF, Goodnight CJ, Lloyd EA, Sapp J, Vandenkoornhuyse P, Zilber-Rosenberg I, Rosenberg E, Bordenstein SR. 2016. Getting the hologenome concept right: an eco-evolutionary framework for hosts and their microbiomes. *mSystems* 1:e00028-16.
48. Rosenberg E, Sharon G, Zilber-Rosenberg I. 2009. The hologenome theory of evolution contains Lamarckian aspects within a Darwinian framework. *Environ Microbiol* 11:2959–2962.
49. Osmanovic D, Kessler DA, Rabin Y, Soen Y. 2018. Darwinian selection of host and

bacteria supports emergence of Lamarckian-like adaptation of the system as a whole. Biol Direct 13:24.

50. Henry LM, Peccoud J, Simon J-C, Hadfield JD, Maiden MJC, Ferrari J, Godfray HCJ. 2013. Horizontally transmitted symbionts and host colonization of ecological niches. Curr Biol 23:1713–1717.

51. Redman RS, Sheehan KB, Stout RG, Rodriguez RJ, Henson JM. 2002. Thermotolerance generated by plant / fungal symbiosis. Science 298:1581.

52. Quigley KM, Willis BL, Bay LK. 2017. Heritability of the *Symbiodinium* community in vertically- and horizontally-transmitting broadcast spawning corals. Sci Rep 7:8219.

53. Buddemeier RW, Baker AC, Fautin DG, Jacobs JR. 2004. The adaptive hypothesis of bleaching, p. 427–444. In Rosenberg, PE, Loya, PY (eds.), Coral Health and Disease. Springer Berlin Heidelberg.

54. Roughgarden J, Gilbert SF, Rosenberg E, Zilber-Rosenberg I, Lloyd EA. 2018. Holobionts as units of selection and a model of their population dynamics and evolution. Biol Theory 13:44–65.

55. Hartmann AC, Baird AH, Knowlton N, Huang D. 2017. The paradox of environmental symbiont acquisition in obligate mutualisms. Curr Biol 27:3711-3716.e3.

56. Grube, M, White, JF, Seckbach, J (eds.). 2010. Symbioses and Stress. Springer, Dordrecht.

57. Kimura M, Ohta T. 1969. The average number of generations until fixation of a mutant gene in a finite population. Genetics 61:763–71.

58. Dekking M. 2005. A modern introduction to probability and statistics : understanding why and how. Springer.
59. Loh WKW, Loi T, Carter D, Hoegh-Guldberg O. 2001. Genetic variability of the symbiotic dinoflagellates from the wide ranging coral species *Seriatopora hystrix* and *Acropora longicyathus* in the Indo-West Pacific. Mar Ecol Prog Ser 222:97–107.
60. Morrow JL, Hall AAG, Riegler M. 2017. Symbionts in waiting: the dynamics of incipient endosymbiont complementation and replacement in minimal bacterial communities of psyllids. Microbiome 5:58.
61. Fisher RM, Henry LM, Cornwallis CK, Kiers ET, West SA. 2017. The evolution of host-symbiont dependence. Nat Commun 8:15973.
62. Ram Y, Liberman U, Feldman MW. 2018. Evolution of vertical and oblique transmission under fluctuating selection. Proc Natl Acad Sci U S A 115:E1174–E1183.
63. Swain TD, Westneat MW, Backman V, Marcelino LA. 2018. Phylogenetic analysis of symbiont transmission mechanisms reveal evolutionary patterns in thermotolerance and host specificity that enhance bleaching resistance among vertically transmitted *Symbiodinium*. Eur J Phycol 53:443–459.
64. Xue B, Leibler S. 2016. Evolutionary learning of adaptation to varying environments through a transgenerational feedback. Proc Natl Acad Sci U S A 113:11266–11271.
65. Salinas S, Brown SC, Mangel M, Munch SB. 2013. Non-genetic inheritance and changing environments. Non-Genetic Inherit 1:38–50.
66. Donelson JM, Salinas S, Munday PL, Shama LNS. 2018. Transgenerational plasticity and



climate change experiments: Where do we go from here? Glob Chang Biol 24:13–34.

67. Quigley KM, Willis BL, Kenkel CD. 2019. Transgenerational inheritance of shuffled symbiont communities in the coral *Montipora digitata*. Sci Rep 9:13328.

68. Cumbo V, van Oppen M, Baird A. 2018. Temperature and *Symbiodinium* physiology affect the establishment and development of symbiosis in corals. Mar Ecol Prog Ser 587:117–127.

69. Rendell L, Boyd R, Cownden D, Enquist M, Eriksson K, Feldman MW, Fogarty L, Ghirlanda S, Lillicrap T, Laland KN. 2010. Why copy others? Insights from the social learning strategies tournament. Science 328:208–13.

70. Shapiro JW, Turner PE. 2014. The impact of transmission mode on the evolution of benefits provided by microbial symbionts. Ecol Evol 4:3350–3361.

71. Denison RF. 2000. Legume sanctions and the evolution of symbiotic cooperation by rhizobia. Am Nat 156:567–576.

72. Visick KL, Foster J, Doino J, McFall-Ngai M, Ruby EG. 2000. *Vibrio fischeri* lux genes play an important role in colonization and development of the host light organ. J Bacteriol 182:4578–86.

73. Wietheger A. 2012. Coral bleaching resistance vs susceptibility: the role of antioxidant activity in symbiotic dinoflagellates. Victoria University of Wellington. PhD thesis.

74. Brown BE. 1997. Coral bleaching: Causes and consequences. Coral Reefs 16:S129–S138.

75. Jones AM, Berkelmans R, Oppen MJH van, Mieog JC, Sinclair W. 2008. A community

change in the algal endosymbionts of a scleractinian coral following a natural bleaching event: field evidence of acclimatization. *Proc R Soc London B Biol Sci* 275:1359–1365.

76. Koga R, Meng X-Y, Tsuchida T, Fukatsu T. 2012. Cellular mechanism for selective vertical transmission of an obligate insect symbiont at the bacteriocyte-embryo interface. *Proc Natl Acad Sci U S A* 109:E1230-7.

77. Karim W, Nakaema S, Hidaka M, Karim W, Nakaema S, Hidaka M. 2015. Temperature effects on the growth rates and photosynthetic activities of *Symbiodinium* cells. *J Mar Sci Eng* 3:368–381.

78. Wernegreen JJ. 2012. Mutualism meltdown in insects: Bacteria constrain thermal adaptation. *Curr Opin Microbiol* 15: 255-262.

79. Montllor CB, Maxmen A, Purcell AH. 2002. Facultative bacterial endosymbionts benefit pea aphids *Acyrtosiphon pisum* under heat stress. *Ecol Entomol* 27:189–195.

80. Richardson SL. 2001. Endosymbiont change as a key innovation in the adaptive radiation of *Soritida* (foraminifera). *Paleobiology* 27:262–289.

81. Matuszewski S, Hermisson J, Kopp M. 2015. Catch me if you can: Adaptation from standing genetic variation to a moving phenotypic optimum. *Genetics* 200:1255–1274.

82. Antonovics J, Wilson AJ, Forbes MR, Hauffe HC, Kallio ER, Leggett HC, Longdon B, Okamura B, Sait SM, Webster JP. 2017. The evolution of transmission mode. *Philos Trans R Soc B Biol Sci. The Royal Society* 372: 20160083.

83. Jones AM, Berkelmans R. 2011. Tradeoffs to thermal acclimation: Energetics and reproduction of a reef coral with heat tolerant *Symbiodinium* type-D. *J Mar Biol* 2011:1–

12.

84. Jones A, Berkelmans R. 2010. Potential costs of acclimatization to a warmer climate: Growth of a reef coral with heat tolerant vs. sensitive symbiont types. PLoS One 5:e10437.
85. Selosse M-A, Baudoin E, Vandenkoornhuyse P. 2004. Symbiotic microorganisms, a key for ecological success and protection of plants. C R Biol 327:639–648.
86. Giaume H, Connor EW, Hawkes C V. 2019. Endophyte traits relevant to stress tolerance, resource use and habitat of origin predict effects on host plants. New Phytol 221:2239–2249.
87. Tchernov D, Gorbunov MY, de Vargas C, Narayan Yadav S, Milligan AJ, Häggblom M, Falkowski PG. 2004. Membrane lipids of symbiotic algae are diagnostic of sensitivity to thermal bleaching in corals. Proc Natl Acad Sci U S A 101:13531–5.
88. Rodriguez R, Redman R. 2008. More than 400 million years of evolution and some plants still can't make it on their own: Plant stress tolerance via fungal symbiosis. Journal of Experimental Botany 59:1109–1114.
89. Baskett ML, Gaines SD, Nisbet RM. 2009. Symbiont diversity may help coral reefs survive moderate climate change. Ecol Appl 19:3–17.
90. Streck NA. 2004. A temperature response function for modeling leaf growth and development of the African violet (*Saintpaulia ionantha* Wendl.). Ciência Rural 34:55–62.
91. Clark JR, Daines SJ, Lenton TM, Watson AJ, Williams HTP. 2011. Individual-based modelling of adaptation in marine microbial populations using genetically defined physiological parameters. Ecol Modell 222:3823–3837.

92. Császár NBM, Ralph PJ, Frankham R, Berkelmans R, van Oppen MJH. 2010. Estimating the potential for adaptation of corals to climate warming. *PLoS One* 5:e9751.
93. Dillon MM, Sung W, Lynch M, Cooper VS. 2018. Periodic variation of mutation rates in bacterial genomes associated with replication timing. *MBio* 9:e01371-18.
94. Portnoy S, Willson MF. 1993. Seed dispersal curves: behavior of the tail of the distribution. *Evolutionary Ecology* 7:25-44.
95. Grimm V, Wissel C. 2004. The intrinsic mean time to extinction: a unifying approach to analysing persistence and viability of populations. *Oikos* 105:501–511.

## ACKNOWLEDGEMENTS

We thank Dr. Rudy Guerra and Dr. Marek Kimmel for providing assistance to our model development.

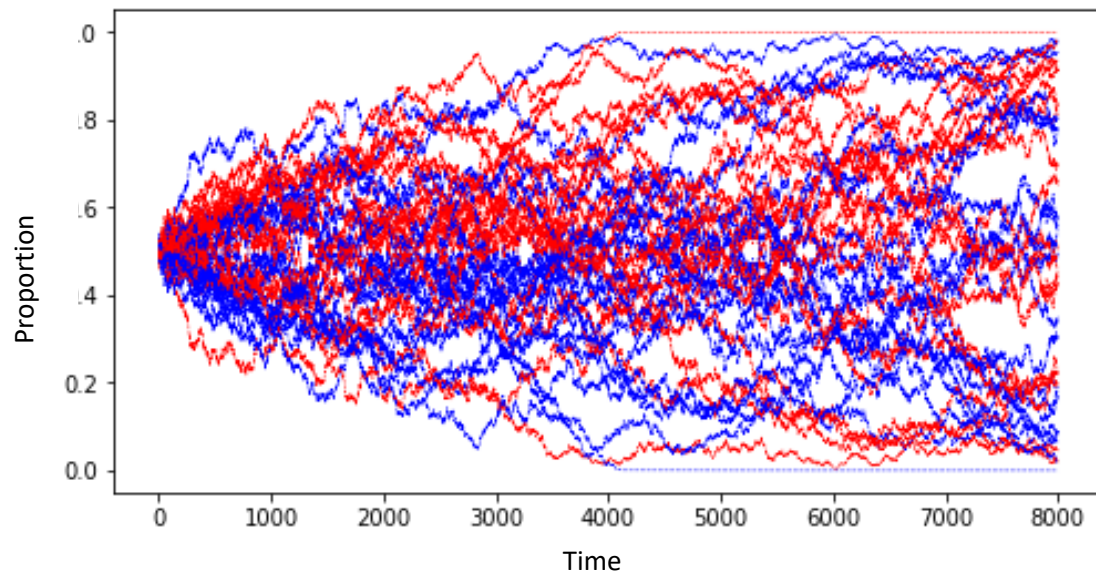

Figure 1: Fixation of holobiont transmission types under selectively neutral conditions and equal starting abundances of vertical and horizontal transmission types. Blue lines indicate the proportion of holobionts that have vertical transmission (V) and red lines indicate the proportion that have horizontal transmission (H). Each simulation is represented by a single blue line and single red line.

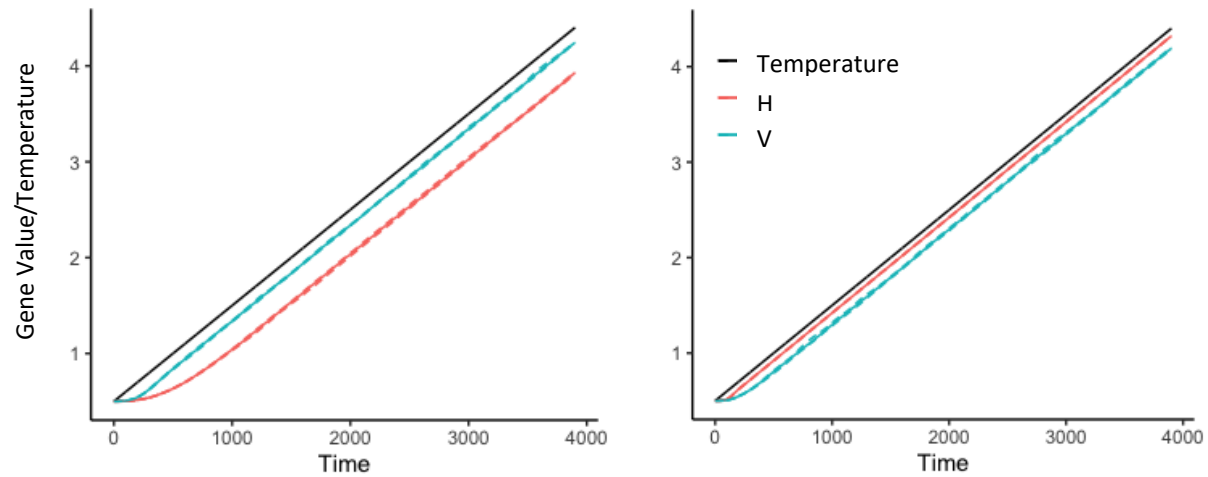

748

749 Figure 2: Average symbiont gene values (optimal temperature value) of horizontal (H) and  
750 vertical (V) transmission mode holobionts in (a) the random transmission model with  
751 temperature rate of change per time step=0.001 and magnitude of mutation with standard  
752 deviation=0.1, (b) the optimal transmission model at step=0.001, mutation\_sd=0.01.

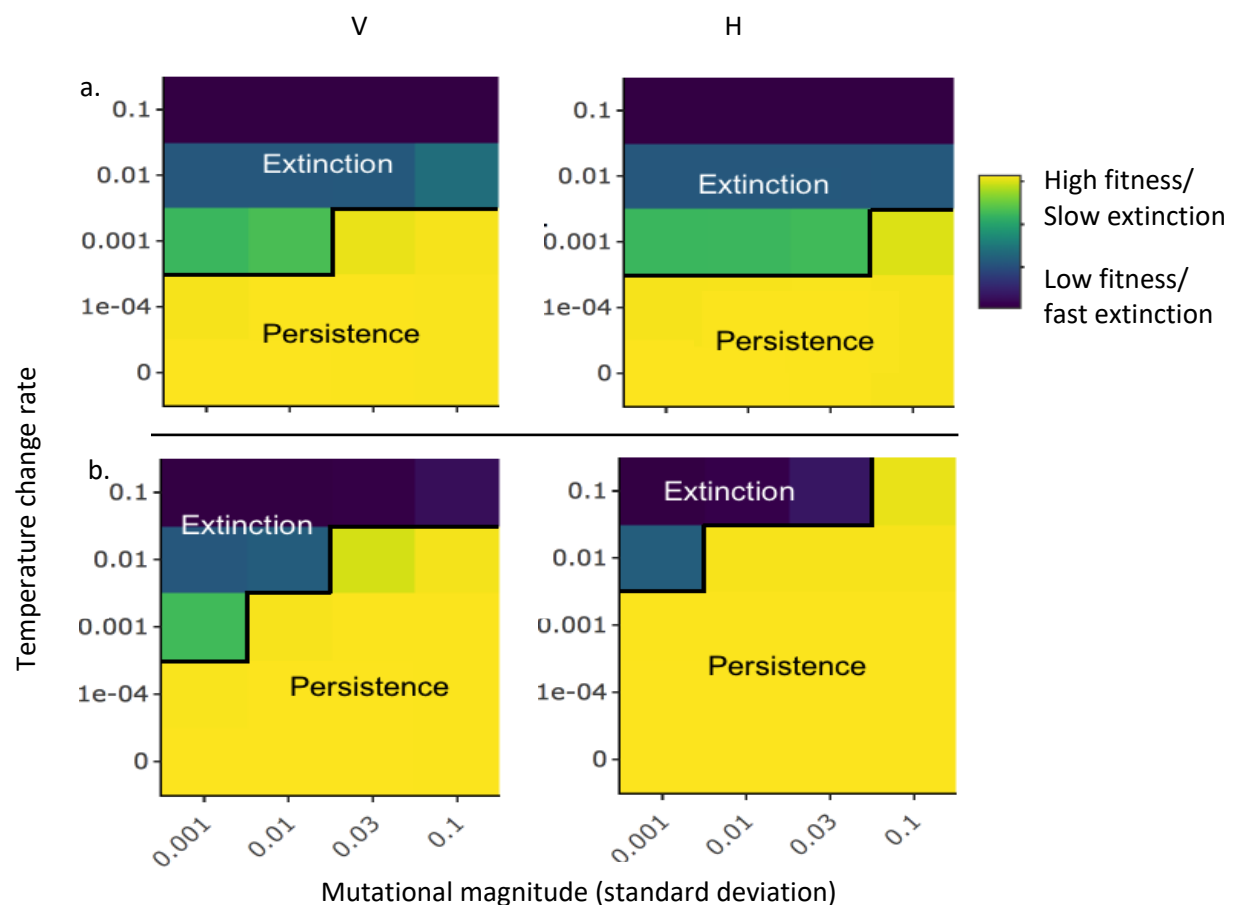

Figure 3: The dependence of fitness and time to extinction of vertical (V) or horizontal (H) transmission holobionts in separate simulations on rate of temperature change (magnitude of change per time step) and mutation magnitude (standard deviation) with (a) the random transmission model, (b) optimal transmission model. Rapid temperature change (large change per time step) and small magnitude mutations (low mutation variance) are likely to lower holobiont fitness and lead to extinction. The scenarios with persistence are those with high average fitness and those with low fitness have rapid extinction.

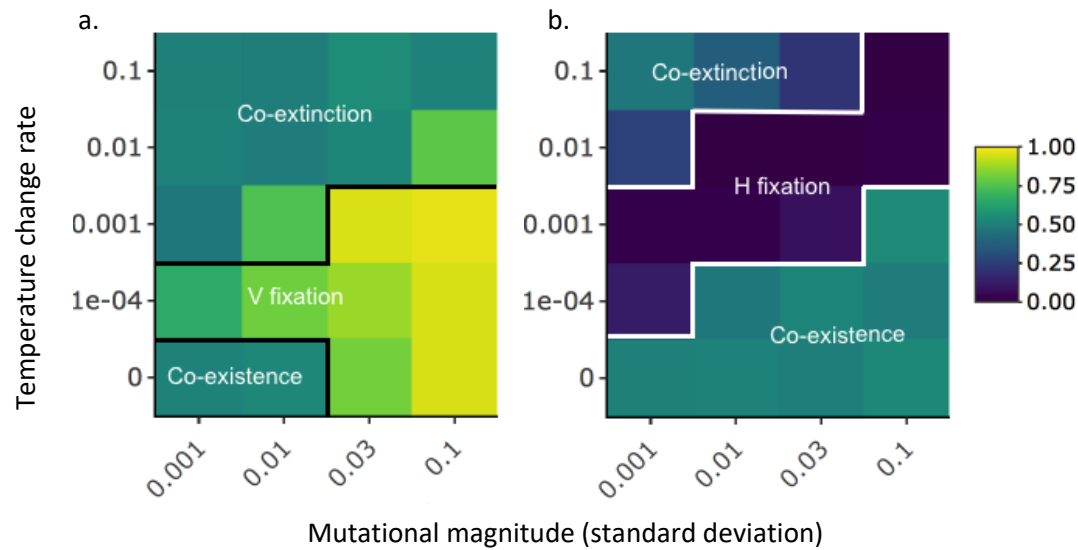

774

775 Figure 4. The dependence of average proportion of vertical transmission holobionts in  
 776 simulations that include both vertical and horizontal transmission types on rate of temperature  
 777 change (magnitude of change per time step) and mutation magnitude (standard deviation) with  
 778 (a) random transmission, (b) optimal transmission. Brighter colors indicate conditions in which  
 779 vertical transmission types reached fixation more quickly (and horizontal types became extinct)  
 780 and darker colors indicate conditions in which vertical transmission types became extinct faster  
 781 (and horizontal types reached fixation).



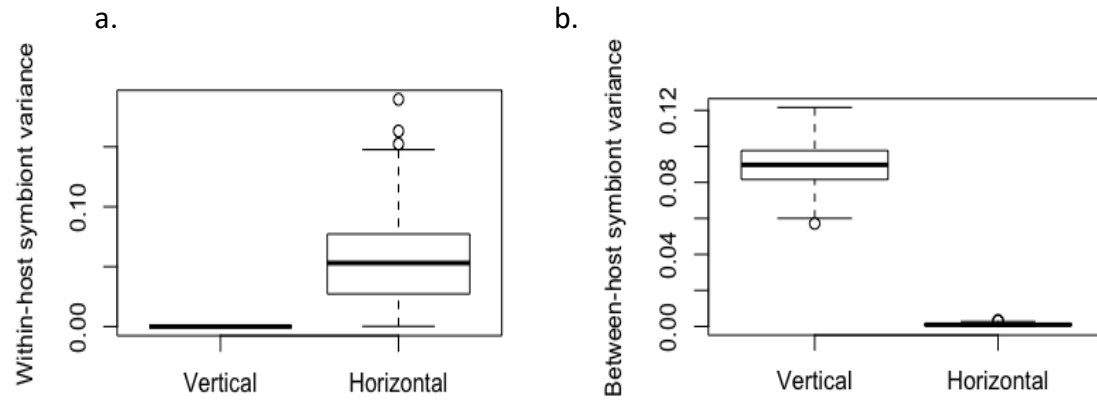

Figure 5: Variance of symbiont fitness scores (a) within hosts (average of the variance of scores for symbionts within single hosts), (b) between hosts (the variance of the average scores of hosts). Each point is the variance in a single random transmission simulation with only vertical or horizontal transmission types after 1000 time steps.

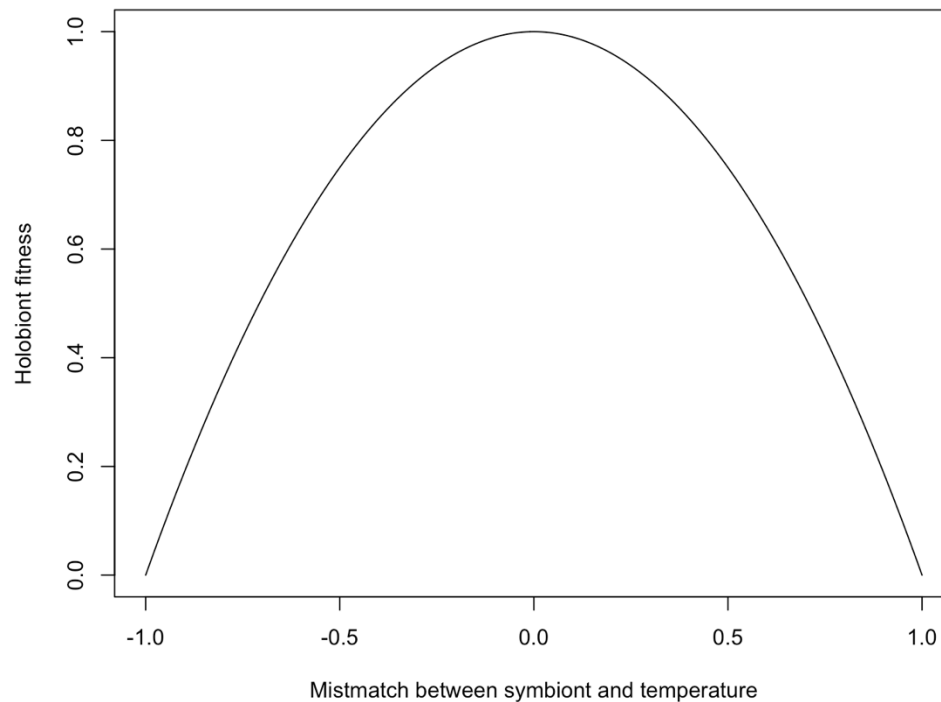

789

790 Figure 6: Fitness curve. The fitness impact of each symbiont on the holobiont (fitness score) was  
791 calculated based the difference between the symbiont gene value (optimal temperature) and the  
792 current temperature. When the symbiont gene value matched the current temperature, the fitness  
793 score was set equal to 1 and it declined (beta function) as the gene value and temperature were  
794 more different. A positive mismatch value indicates the environment is colder than the optimal  
795 value for the symbiont and a negative value indicates the environment is colder than the optimal  
796 value.
